# Supplementary material
Source: publisher figshare collection journal article supplement (https://rs.figshare.com/ndownloader/files/17379734)
Supplement: Supplementary file 1 [file 17379734]

## Sheet: All data
Date	Net?	# of Cases	Tree ID	Notes	Overall Notes
2017-10-16	N	0	1		Day one, one side of Fannin Street completed
2017-10-16	N	0	2		For all netted trees, cases were exclusively found on the trunk and on the actual net.
2017-10-16	N	0	3		For all non-netted trees, cases were exclusively found on leaves.
2017-10-16	N	1	4		Non-netted trees were labeled using red field tape.
2017-10-16	N	0	5		Route runs straight down from Texas Chiladren's sign (closest to Rice) to the intersection of John Freeman and Fannin.
2017-10-16	N	10	6		Wednesday, will do other side of the street.
2017-10-16	N	3	7
2017-10-16	N	0	8		Average Netted	25.5652	Median Netted	17
2017-10-16	N	14	9		Average Non-Netted	0.870968	Median Non-Netted	1
2017-10-16	N	6	10
2017-10-16	N	18	11		Number Netted	69
2017-10-16	N	2	12		Number Non-Netted	93
2017-10-16	N	4	13
2017-10-16	N	1	14		TOTAL	162
2017-10-16	N	4	15
2017-10-16	Y	76	16
2017-10-16	Y	88	17
2017-10-16	Y	12	18
2017-10-16	Y	3	19
2017-10-16	Y	40	20
2017-10-16	Y	0	21
2017-10-16	Y	12	22
2017-10-16	Y	52	23
2017-10-16	Y	29	24
2017-10-16	Y	48	25
2017-10-16	Y	64	26
2017-10-16	Y	15	27
2017-10-16	Y	14	28
2017-10-16	Y	161	29
2017-10-16	Y	54	30
2017-10-16	Y	37	31
2017-10-16	Y	30	32
2017-10-16	Y	16	33
2017-10-16	Y	22	34
2017-10-16	Y	61	35
2017-10-16	Y	32	36
2017-10-16	Y	15	37
2017-10-16	Y	7	38
2017-10-16	Y	40	39
2017-10-16	Y	17	40
2017-10-16	Y	0	41
2017-10-16	Y	28	42
2017-10-16	Y	45	43
2017-10-16	Y	17	44
2017-10-16	N	0	45
2017-10-16	N	0	46
2017-10-16	N	2	47
2017-10-16	N	6	48
2017-10-16	N	1	49
2017-10-16	N	0	50
2017-10-16	N	4	51
2017-10-16	N	0	52	Ended at intersection of John Freeman and Fannin, side closest to Rice is done.
2017-10-23	Y	0	53
2017-10-23	Y	0	54
2017-10-23	Y	0	55
2017-10-23	Y	1	56
2017-10-23	Y	11	57
2017-10-23	Y	0	58
2017-10-23	Y	2	59
2017-10-23	Y	0	60
2017-10-23	Y	3	61
2017-10-23	Y	6	62
2017-10-23	Y	7	63
2017-10-23	Y	1	64
2017-10-23	Y	4	65
2017-10-23	Y	25	66
2017-10-23	Y	7	67
2017-10-23	Y	105	68
2017-10-23	Y	22	69
2017-10-23	Y	26	70
2017-10-23	Y	56	71
2017-10-23	Y	114	72
2017-10-23	Y	23	73
2017-10-23	Y	7	74
2017-10-23	Y	57	75
2017-10-23	Y	18	76
2017-10-23	Y	22	77
2017-10-23	Y	10	78
2017-10-23	Y	28	79
2017-10-23	Y	18	80
2017-10-23	Y	51	81
2017-10-23	Y	15	82
2017-10-23	Y	22	83
2017-10-23	Y	4	84
2017-10-23	Y	3	85
2017-10-23	Y	9	86
2017-10-23	Y	0	87
2017-10-23	Y	4	88
2017-10-23	Y	3	89
2017-10-23	Y	22	90
2017-10-23	Y	4	91
2017-10-23	Y	19	92
	N	0	93	Scott Data Starts here-no bird netting
	N	0	94
	N	0	95
	N	0	96
	N	0	97
	N	0	98
	N	0	99
	N	0	100
	N	0	101
	N	0	102
	N	0	103
	N	0	104
	N	0	105
	N	0	106
	N	0	107
	N	0	108
	N	0	109
	N	0	110
	N	0	111
	N	0	112
	N	0	113
	N	0	114
	N	0	115
	N	0	116
	N	0	117
	N	0	118
	N	0	119
	N	0	120
	N	0	121
	N	0	122
	N	0	123
	N	0	124
	N	0	125
	N	0	126
	N	0	127
	N	0	128
	N	0	129
	N	0	130
	N	0	131
	N	0	132
	N	0	133
	N	0	134
	N	0	135
	N	0	136
	N	0	137
	N	0	138
	N	0	139
	N	0	140
	N	0	141
	N	0	142
	N	0	143
	N	0	144
	N	0	145
	N	0	146
	N	0	147
	N	0	148
	N	0	149
	N	0	150
	N	0	151
	N	0	152
	N	0	153
	N	0	154
	N	0	155
	N	0	156
	N	0	157
	N	0	158
	N	1	159
	N	2	160
	N	1	161
	N	1	162

## Sheet: Full Coded Data
Date of Survey	Netted (Y) versus non-netted (N)	Number of asp	Location	Year	Previously netted
2015-11-03	N	3	TMC	2015	N
2015-11-03	N	0	TMC	2015	N
2015-11-03	N	0	TMC	2015	N
2015-11-03	N	0	TMC	2015	N
2015-11-03	N	1	TMC	2015	N
2015-11-03	N	0	TMC	2015	N
2015-11-03	N	2	TMC	2015	N
2015-11-03	N	0	TMC	2015	N
2015-11-03	N	0	TMC	2015	N
2015-11-03	N	0	TMC	2015	N
2015-11-03	N	0	TMC	2015	N
2015-11-03	N	0	TMC	2015	N
2015-11-03	N	0	TMC	2015	N
2015-11-03	N	0	TMC	2015	N
2015-11-03	N	0	TMC	2015	N
2015-11-03	N	0	TMC	2015	N
2015-11-03	N	0	TMC	2015	N
2015-11-03	N	1	TMC	2015	N
2015-11-03	N	0	TMC	2015	N
2015-11-03	Y	37	TMC	2015	N
2015-11-03	Y	3	TMC	2015	N
2015-11-03	Y	65	TMC	2015	N
2015-11-03	Y	14	TMC	2015	N
2015-11-03	Y	43	TMC	2015	N
2015-11-03	Y	12	TMC	2015	N
2015-11-03	Y	8	TMC	2015	N
2015-11-03	Y	17	TMC	2015	N
2015-11-03	Y	13	TMC	2015	N
2015-11-03	Y	38	TMC	2015	N
2015-11-03	Y	11	TMC	2015	N
2015-11-03	Y	7	TMC	2015	N
2015-11-03	Y	16	TMC	2015	N
2015-11-03	Y	19	TMC	2015	N
2015-11-03	Y	33	TMC	2015	N
2015-11-03	Y	7	TMC	2015	N
2015-11-03	Y	29	TMC	2015	N
2015-11-03	Y	10	TMC	2015	N
2017-10-23	N	0	Rice	2017	N
2017-10-23	N	0	Rice	2017	N
2017-10-23	N	0	Rice	2017	N
2017-10-23	N	0	Rice	2017	N
2017-10-23	N	0	Rice	2017	N
2017-10-23	N	0	Rice	2017	N
2017-10-23	N	0	Rice	2017	N
2017-10-23	N	0	Rice	2017	N
2017-10-23	N	0	Rice	2017	N
2017-10-23	N	0	Rice	2017	N
2017-10-23	N	0	Rice	2017	N
2017-10-23	N	0	Rice	2017	N
2017-10-23	N	0	Rice	2017	N
2017-10-23	N	0	Rice	2017	N
2017-10-23	N	0	Rice	2017	N
2017-10-23	N	0	Rice	2017	N
2017-10-23	N	0	Rice	2017	N
2017-10-23	N	0	Rice	2017	N
2017-10-23	N	0	Rice	2017	N
2017-10-23	N	0	Rice	2017	N
2017-10-23	N	0	Rice	2017	N
2017-10-23	N	0	Rice	2017	N
2017-10-23	N	0	Rice	2017	N
2017-10-23	N	0	Rice	2017	N
2017-10-23	N	0	Rice	2017	N
2017-10-23	N	0	Rice	2017	N
2017-10-23	N	0	Rice	2017	N
2017-10-23	N	0	Rice	2017	N
2017-10-23	N	0	Rice	2017	N
2017-10-23	N	0	Rice	2017	N
2017-10-23	N	0	Rice	2017	N
2017-10-23	N	0	Rice	2017	N
2017-10-23	N	0	Rice	2017	N
2017-10-23	N	0	Rice	2017	N
2017-10-23	N	0	Rice	2017	N
2017-10-23	N	0	Rice	2017	N
2017-10-23	N	0	Rice	2017	N
2017-10-23	N	0	Rice	2017	N
2017-10-23	N	0	Rice	2017	N
2017-10-23	N	0	Rice	2017	N
2017-10-23	N	0	Rice	2017	N
2017-10-23	N	0	Rice	2017	N
2017-10-23	N	0	Rice	2017	N
2017-10-23	N	0	Rice	2017	N
2017-10-23	N	0	Rice	2017	N
2017-10-23	N	0	Rice	2017	N
2017-10-23	N	0	Rice	2017	N
2017-10-23	N	0	Rice	2017	N
2017-10-23	N	0	Rice	2017	N
2017-10-23	N	0	Rice	2017	N
2017-10-23	N	0	Rice	2017	N
2017-10-23	N	0	Rice	2017	N
2017-10-23	N	0	Rice	2017	N
2017-10-23	N	0	Rice	2017	N
2017-10-23	N	0	Rice	2017	N
2017-10-23	N	0	Rice	2017	N
2017-10-23	N	0	Rice	2017	N
2017-10-23	N	0	Rice	2017	N
2017-10-23	N	0	Rice	2017	N
2017-10-23	N	0	Rice	2017	N
2017-10-23	N	0	Rice	2017	N
2017-10-23	N	0	Rice	2017	N
2017-10-23	N	0	Rice	2017	N
2017-10-23	N	0	Rice	2017	N
2017-10-23	N	0	Rice	2017	N
2017-10-23	N	0	Rice	2017	N
2017-10-23	N	1	Rice	2017	N
2017-10-23	N	2	Rice	2017	N
2017-10-23	N	1	Rice	2017	N
2017-10-23	N	1	Rice	2017	N
2017-10-16	N	0	TMC	2017	N
2017-10-16	N	0	TMC	2017	N
2017-10-16	N	0	TMC	2017	N
2017-10-16	N	1	TMC	2017	N
2017-10-16	N	0	TMC	2017	N
2017-10-16	N	10	TMC	2017	N
2017-10-16	N	3	TMC	2017	N
2017-10-16	N	0	TMC	2017	N
2017-10-16	N	14	TMC	2017	N
2017-10-16	N	6	TMC	2017	N
2017-10-16	N	18	TMC	2017	N
2017-10-16	N	2	TMC	2017	N
2017-10-16	N	4	TMC	2017	N
2017-10-16	N	1	TMC	2017	N
2017-10-16	N	4	TMC	2017	N
2017-10-16	N	0	TMC	2017	N
2017-10-16	N	0	TMC	2017	N
2017-10-16	N	2	TMC	2017	N
2017-10-16	N	6	TMC	2017	N
2017-10-16	N	1	TMC	2017	N
2017-10-16	N	0	TMC	2017	N
2017-10-16	N	4	TMC	2017	N
2017-10-16	N	0	TMC	2017	N
2017-10-16	Y	76	TMC	2017	N
2017-10-16	Y	88	TMC	2017	N
2017-10-16	Y	12	TMC	2017	N
2017-10-16	Y	3	TMC	2017	N
2017-10-16	Y	40	TMC	2017	N
2017-10-16	Y	0	TMC	2017	N
2017-10-16	Y	12	TMC	2017	N
2017-10-16	Y	52	TMC	2017	N
2017-10-16	Y	29	TMC	2017	N
2017-10-16	Y	48	TMC	2017	N
2017-10-16	Y	64	TMC	2017	N
2017-10-16	Y	15	TMC	2017	N
2017-10-16	Y	14	TMC	2017	N
2017-10-16	Y	161	TMC	2017	N
2017-10-16	Y	54	TMC	2017	N
2017-10-16	Y	37	TMC	2017	N
2017-10-16	Y	30	TMC	2017	N
2017-10-16	Y	16	TMC	2017	N
2017-10-16	Y	22	TMC	2017	N
2017-10-16	Y	61	TMC	2017	N
2017-10-16	Y	32	TMC	2017	N
2017-10-16	Y	15	TMC	2017	N
2017-10-16	Y	7	TMC	2017	N
2017-10-16	Y	40	TMC	2017	N
2017-10-16	Y	17	TMC	2017	N
2017-10-16	Y	0	TMC	2017	N
2017-10-16	Y	28	TMC	2017	N
2017-10-16	Y	45	TMC	2017	N
2017-10-16	Y	17	TMC	2017	N
2017-10-23	Y	0	TMC	2017	N
2017-10-23	Y	0	TMC	2017	N
2017-10-23	Y	0	TMC	2017	N
2017-10-23	Y	1	TMC	2017	N
2017-10-23	Y	11	TMC	2017	N
2017-10-23	Y	0	TMC	2017	N
2017-10-23	Y	2	TMC	2017	N
2017-10-23	Y	0	TMC	2017	N
2017-10-23	Y	3	TMC	2017	N
2017-10-23	Y	6	TMC	2017	N
2017-10-23	Y	7	TMC	2017	N
2017-10-23	Y	1	TMC	2017	N
2017-10-23	Y	4	TMC	2017	N
2017-10-23	Y	25	TMC	2017	N
2017-10-23	Y	7	TMC	2017	N
2017-10-23	Y	105	TMC	2017	N
2017-10-23	Y	22	TMC	2017	N
2017-10-23	Y	26	TMC	2017	N
2017-10-23	Y	56	TMC	2017	N
2017-10-23	Y	114	TMC	2017	N
2017-10-23	Y	23	TMC	2017	N
2017-10-23	Y	7	TMC	2017	N
2017-10-23	Y	57	TMC	2017	N
2017-10-23	Y	18	TMC	2017	N
2017-10-23	Y	22	TMC	2017	N
2017-10-23	Y	10	TMC	2017	N
2017-10-23	Y	28	TMC	2017	N
2017-10-23	Y	18	TMC	2017	N
2017-10-23	Y	51	TMC	2017	N
2017-10-23	Y	15	TMC	2017	N
2017-10-23	Y	22	TMC	2017	N
2017-10-23	Y	4	TMC	2017	N
2017-10-23	Y	3	TMC	2017	N
2017-10-23	Y	9	TMC	2017	N
2017-10-23	Y	0	TMC	2017	N
2017-10-23	Y	4	TMC	2017	N
2017-10-23	Y	3	TMC	2017	N
2017-10-23	Y	22	TMC	2017	N
2017-10-23	Y	4	TMC	2017	N
2017-10-23	Y	19	TMC	2017	N
2018-10-25	N	3	HP	2018	N
2018-10-25	N	0	HP	2018	N
2018-10-25	N	1	HP	2018	N
2018-10-25	N	0	HP	2018	N
2018-10-25	N	0	HP	2018	N
2018-10-25	N	0	HP	2018	N
2018-10-25	N	0	HP	2018	N
2018-10-25	N	0	HP	2018	N
2018-10-25	N	0	HP	2018	N
2018-10-25	N	1	HP	2018	N
2018-10-25	N	2	HP	2018	N
2018-10-25	N	0	HP	2018	N
2018-10-25	N	1	HP	2018	N
2018-10-25	N	0	HP	2018	N
2018-10-25	N	0	HP	2018	N
2018-10-25	N	0	HP	2018	N
2018-10-25	N	0	HP	2018	N
2018-10-25	N	0	HP	2018	N
2018-10-25	N	0	HP	2018	N
2018-10-25	N	0	HP	2018	N
2018-10-25	N	0	HP	2018	N
2018-10-25	N	0	HP	2018	N
2018-10-25	N	0	HP	2018	N
2018-10-25	N	2	HP	2018	N
2018-10-25	N	0	HP	2018	N
2018-10-25	N	0	HP	2018	N
2018-10-25	N	0	HP	2018	N
2018-10-25	N	1	HP	2018	N
2018-10-25	N	0	HP	2018	N
2018-10-25	N	0	HP	2018	N
2018-10-25	N	0	HP	2018	N
2018-10-25	N	0	HP	2018	N
2018-10-25	N	1	Rice	2018	N
2018-10-25	N	0	Rice	2018	N
2018-10-25	N	0	Rice	2018	N
2018-10-25	N	0	Rice	2018	N
2018-10-25	N	0	Rice	2018	N
2018-10-25	N	0	Rice	2018	N
2018-10-25	N	2	Rice	2018	N
2018-10-25	N	1	Rice	2018	N
2018-10-25	N	0	Rice	2018	N
2018-10-25	N	1	Rice	2018	N
2018-10-25	N	0	Rice	2018	N
2018-10-25	N	0	Rice	2018	N
2018-10-25	N	0	Rice	2018	N
2018-10-25	N	0	Rice	2018	N
2018-10-25	N	0	Rice	2018	N
2018-10-25	N	1	Rice	2018	N
2018-10-25	N	0	Rice	2018	N
2018-10-25	N	0	Rice	2018	N
2018-10-25	N	0	Rice	2018	N
2018-10-25	N	0	Rice	2018	N
2018-10-25	N	0	Rice	2018	N
2018-10-25	N	0	Rice	2018	N
2018-10-25	N	0	Rice	2018	N
2018-10-25	N	0	Rice	2018	N
2018-10-25	N	0	Rice	2018	N
2018-10-25	N	0	Rice	2018	N
2018-10-25	N	0	Rice	2018	N
2018-10-25	N	1	Rice	2018	N
2018-10-25	N	0	Rice	2018	N
2018-10-25	N	0	Rice	2018	N
2018-10-25	N	0	Rice	2018	N
2018-10-25	N	0	Rice	2018	N
2018-10-25	N	2	Rice	2018	N
2018-10-25	N	0	Rice	2018	N
2018-10-25	N	0	Rice	2018	N
2018-10-25	N	0	Rice	2018	N
2018-10-25	N	0	Rice	2018	N
2018-10-25	N	0	Rice	2018	N
2018-10-25	N	0	Rice	2018	N
2018-10-25	N	1	Rice	2018	N
2018-10-25	N	0	Rice	2018	N
2018-10-25	N	0	Rice	2018	N
2018-10-25	N	0	Rice	2018	N
2018-10-25	N	0	Rice	2018	N
2018-10-25	N	0	Rice	2018	N
2018-10-25	N	1	Rice	2018	N
2018-10-25	N	0	Rice	2018	N
2018-10-25	N	0	Rice	2018	N
2018-10-25	N	1	Rice	2018	N
2018-10-25	N	0	Rice	2018	N
2018-10-25	N	0	Rice	2018	N
2018-10-25	N	0	Rice	2018	N
2018-10-25	N	0	Rice	2018	N
2018-10-25	N	0	Rice	2018	N
2018-10-25	N	0	Rice	2018	N
2018-10-25	N	0	Rice	2018	N
2018-10-25	N	0	Rice	2018	N
2018-10-25	N	0	Rice	2018	N
2018-10-25	N	0	Rice	2018	N
2018-10-25	N	0	Rice	2018	N
2018-10-25	N	0	Rice	2018	N
2018-10-25	N	0	Rice	2018	N
2018-10-25	N	1	Rice	2018	N
2018-10-25	N	0	Rice	2018	N
2018-10-25	N	0	Rice	2018	N
2018-10-25	N	0	Rice	2018	N
2018-10-25	N	0	Rice	2018	N
2018-10-25	N	0	Rice	2018	N
2018-10-25	N	0	Rice	2018	N
2018-10-25	N	1	Rice	2018	N
2018-10-25	N	0	Rice	2018	N
2018-10-25	N	1	Rice	2018	N
2018-10-25	N	0	Rice	2018	N
2018-10-25	N	0	SG	2018	N
2018-10-25	N	0	SG	2018	N
2018-10-25	N	0	SG	2018	N
2018-10-25	N	0	SG	2018	N
2018-10-25	N	0	SG	2018	N
2018-10-25	N	0	SG	2018	N
2018-10-25	N	0	SG	2018	N
2018-10-25	N	0	SG	2018	N
2018-10-25	N	0	SG	2018	N
2018-10-25	N	0	SG	2018	N
2018-10-25	N	1	SG	2018	N
2018-10-25	N	0	SG	2018	N
2018-10-25	N	2	SG	2018	N
2018-10-25	N	0	SG	2018	N
2018-10-25	N	0	SG	2018	N
2018-10-25	N	0	SG	2018	N
2018-10-25	N	0	SG	2018	N
2018-10-25	N	0	SG	2018	N
2018-10-25	N	0	SG	2018	N
2018-10-25	N	1	SG	2018	N
2018-10-25	N	0	SG	2018	N
2018-10-25	N	0	SG	2018	N
2018-10-25	N	3	SG	2018	N
2018-10-25	N	0	SG	2018	N
2018-10-25	N	0	SG	2018	N
2018-10-25	N	1	SG	2018	N
2018-10-25	N	0	SG	2018	N
2018-10-25	N	0	SG	2018	N
2018-10-25	N	1	SG	2018	N
2018-10-25	N	1	SG	2018	N
2018-10-25	N	0	SG	2018	N
2018-10-25	N	1	SG	2018	N
2018-10-25	N	0	TMC	2018	N
2018-10-25	N	0	TMC	2018	N
2018-10-25	N	0	TMC	2018	N
2018-10-25	N	1	TMC	2018	N
2018-10-25	N	0	TMC	2018	N
2018-10-25	N	1	TMC	2018	N
2018-10-25	N	3	TMC	2018	N
2018-10-25	N	0	TMC	2018	N
2018-10-25	N	5	TMC	2018	N
2018-10-25	N	44	TMC	2018	Y
2018-10-25	N	130	TMC	2018	Y
2018-10-25	N	46	TMC	2018	Y
2018-10-25	N	16	TMC	2018	Y
2018-10-25	N	41	TMC	2018	Y
2018-10-25	N	56	TMC	2018	Y
2018-10-25	N	47	TMC	2018	Y
2018-10-25	N	45	TMC	2018	Y
2018-10-25	N	57	TMC	2018	Y
2018-10-25	N	44	TMC	2018	Y
2018-10-25	N	16	TMC	2018	Y
2018-10-25	N	81	TMC	2018	Y
2018-10-25	N	2	TMC	2018	N
2018-10-25	N	1	TMC	2018	N
2018-10-25	N	0	TMC	2018	N
2018-10-25	N	0	TMC	2018	N
2018-10-25	N	1	TMC	2018	N
2018-10-25	N	0	TMC	2018	N
2018-10-25	N	0	TMC	2018	N
2018-10-25	N	1	TMC	2018	N
2018-10-25	N	0	TMC	2018	N
2018-10-25	N	0	TMC	2018	N
2018-10-25	N	0	TMC	2018	N
2018-10-25	N	0	TMC	2018	N
2018-10-25	N	0	TMC	2018	N
2018-10-25	N	0	TMC	2018	N
2018-10-25	N	0	TMC	2018	N
2018-10-25	N	0	TMC	2018	N
2018-10-25	N	1	TMC	2018	N
2018-10-25	N	0	TMC	2018	N
2018-10-25	N	0	TMC	2018	N
2018-10-25	Y	198	TMC	2018	N
2018-10-25	Y	166	TMC	2018	N
2018-10-25	Y	91	TMC	2018	N
2018-10-25	Y	10	TMC	2018	N
2018-10-25	Y	44	TMC	2018	N
2018-10-25	Y	197	TMC	2018	N
2018-10-25	Y	93	TMC	2018	N
2018-10-25	Y	56	TMC	2018	N
2018-10-25	Y	76	TMC	2018	N
2018-10-25	Y	41	TMC	2018	N
2018-10-25	Y	71	TMC	2018	N
2018-10-25	Y	88	TMC	2018	N
2018-10-25	Y	87	TMC	2018	N
2018-10-25	Y	94	TMC	2018	N
2018-10-25	Y	140	TMC	2018	N
2018-10-25	Y	285	TMC	2018	N
2018-10-25	Y	69	TMC	2018	N
2018-10-25	Y	18	TMC	2018	N
2018-10-25	Y	15	TMC	2018	N
2018-10-25	Y	166	TMC	2018	N
2018-10-25	Y	107	TMC	2018	N
2018-10-25	Y	21	TMC	2018	N
2018-10-25	Y	8	TMC	2018	N
2018-10-25	Y	51	TMC	2018	N
2018-10-25	Y	24	TMC	2018	N
2018-10-25	Y	10	TMC	2018	N
2018-10-25	Y	20	TMC	2018	N
2018-10-25	Y	21	TMC	2018	N
2018-10-25	Y	40	TMC	2018	N
2018-10-25	Y	23	TMC	2018	N
2018-10-25	Y	64	TMC	2018	N
2018-10-25	Y	30	TMC	2018	N
2018-10-25	Y	81	TMC	2018	N
2018-10-25	Y	58	TMC	2018	N
2018-10-25	Y	40	TMC	2018	N
2018-10-25	Y	22	TMC	2018	N
2018-10-25	Y	55	TMC	2018	N
2018-10-25	Y	58	TMC	2018	N
2018-10-25	Y	87	TMC	2018	N
2018-10-25	Y	41	TMC	2018	N
2018-10-25	Y	65	TMC	2018	N
2018-10-25	Y	159	TMC	2018	N
2018-10-25	Y	108	TMC	2018	N
2018-10-25	Y	60	TMC	2018	N
2018-10-25	Y	28	TMC	2018	N
2018-10-25	Y	57	TMC	2018	N
2018-10-25	Y	23	TMC	2018	N
2018-10-25	Y	21	TMC	2018	N
2018-10-25	Y	17	TMC	2018	N
2018-10-25	Y	12	TMC	2018	N
2018-10-25	Y	0	TMC	2018	N
2018-10-25	Y	13	TMC	2018	N
2018-10-25	Y	4	TMC	2018	N
2018-10-25	Y	10	TMC	2018	N
2018-10-25	Y	1	TMC	2018	N
2018-10-25	Y	5	TMC	2018	N
2018-10-25	Y	2	TMC	2018	N
2018-10-25	Y	40	TMC	2018	N
2018-10-25	Y	3	TMC	2018	N
2018-10-25	Y	17	TMC	2018	N
2018-10-25	Y	17	TMC	2018	N
2018-10-25	Y	4	TMC	2018	N
